# Supplementary material
Source: ML conference proceedings conference paper supplement (https://openaccess.thecvf.com/content/WACV2025/html/Hakim_CLIPArTT_Adaptation_of_WACV_2025_paper.html)
Supplement: Supplementary file 1 [file Hakim_CLIPArTT_Adaptation_of_WACV_2025_supplemental.pdf]

# CLIPArTT: Adaptation of CLIP to New Domains at Test Time - Supplementary Material

## 1. Dataset Details

We evaluate CLIPArTT’s performance across diverse TTA datasets using established methodologies. These datasets simulate challenging scenarios, offering insights into our approach’s efficacy. Additionally, we explore CLIPArTT’s adaptability on other datasets through zero-shot test-time adaptation.

Our evaluation framework encompasses *natural images*, *varied styles and textures images*, *common corruptions*, *simulated images*, and *video* providing a comprehensive assessment of the model’s performance across diverse challenges.

In our evaluation of *natural images* (also known as zero-shot scenario), we utilize CIFAR-10, CIFAR-10.1, and CIFAR-100 datasets, each comprising 10,000 images and featuring 10 and 100 classes, respectively. These datasets represent natural imagery and are novel to the model under scrutiny. Notably, CIFAR-10.1 introduces a natural domain shift from CIFAR-10, thereby enriching our assessment with varied and nuanced data distributions. We also evaluate our method on ImageNet and extend our investigation on two datasets mostly used in the field of domain generalization: PACS [2] and OfficeHome [5] datasets, instrumental in understanding *texture and style variations*. The PACS dataset consists of 9,991 images across four domains (Art, Cartoons, Photos, Sketches) and seven classes. Lastly, the OfficeHome dataset includes 15,588 images across four domains (Art, Clipart, Product, Real) and 65 classes. Evaluating across these distinct scenarios showcases the generalizability of our method.

Transitioning to our investigation of *common corruptions*, we turn to the CIFAR-10-C and CIFAR-100-C [1]. These datasets offer a diverse range of 15 distinct corruptions, including elastic transform and impulse noise, among others. Each corruption is characterized by 5 severity levels, yielding a total of 75 unique testing scenarios per dataset. Within each severity level, there are 10,000 images, contributing to a comprehensive evaluation of the model’s robustness against a variety of corruption types and intensities. Finally, we test our method on ImageNet-C to evaluate its performance on a larger dataset with 1,000 classes.

Finally, we examine the VisDA-C dataset’s [4] two do-

main shifts: *simulated* (3D) and *video* (YT). The former comprises a set of 152,397 images rendered in 3D across 12 different classes. The latter includes 72,372 YouTube video frames spanning the same categories. This dataset presents an important challenge, as it bridges the gap of the type of imagery that a model can be applied on.

## 2. Unsupervised clustering

In Fig. 1, tSNE visualizations of data points are shown. We show how the distribution of data points change after adaptation, which improves the accuracy of class predictions and facilitates the assignment of ground truth labels.

## 3. Additional settings

We explore additional experimental settings to further explore the strengths and weaknesses of CLIPArTT. Although these scenarios deviate from the standard practices in the TTA literature, they are useful to evaluate a method’s performance in potentially challenging real-world applications. For most of the following experiments, we utilize the CIFAR-10 dataset’s variants, unless otherwise is mentioned.

### 3.1. Imbalanced batch instances

CLIPArTT adapts to batch data in a transductive manner by computing the image-to-image similarity. The diversity of the batches cannot be ensured due to their finite size. The opposite case naturally arises in large scale classification datasets such as ImageNet, where including at least one image per class in a batch of size 128 is impossible. On the other hand, adaptation to highly imbalanced batches is understudied.

In this experiment, we force extreme imbalances in the batches, by allowing only  $C$  randomly chosen classes to be present in the batch. As CLIPArTT is dependant also on the most probable predictions, it is expected that the misclassification due to the imbalance would drive the model to directions opposite to the actual correct classes. In this experiment, we evaluate with  $C = \{2, 3, 4, 5\}$  as the possible number of classes to be present in the batches, and compare CLIPArTT against TENT. Final results are shown

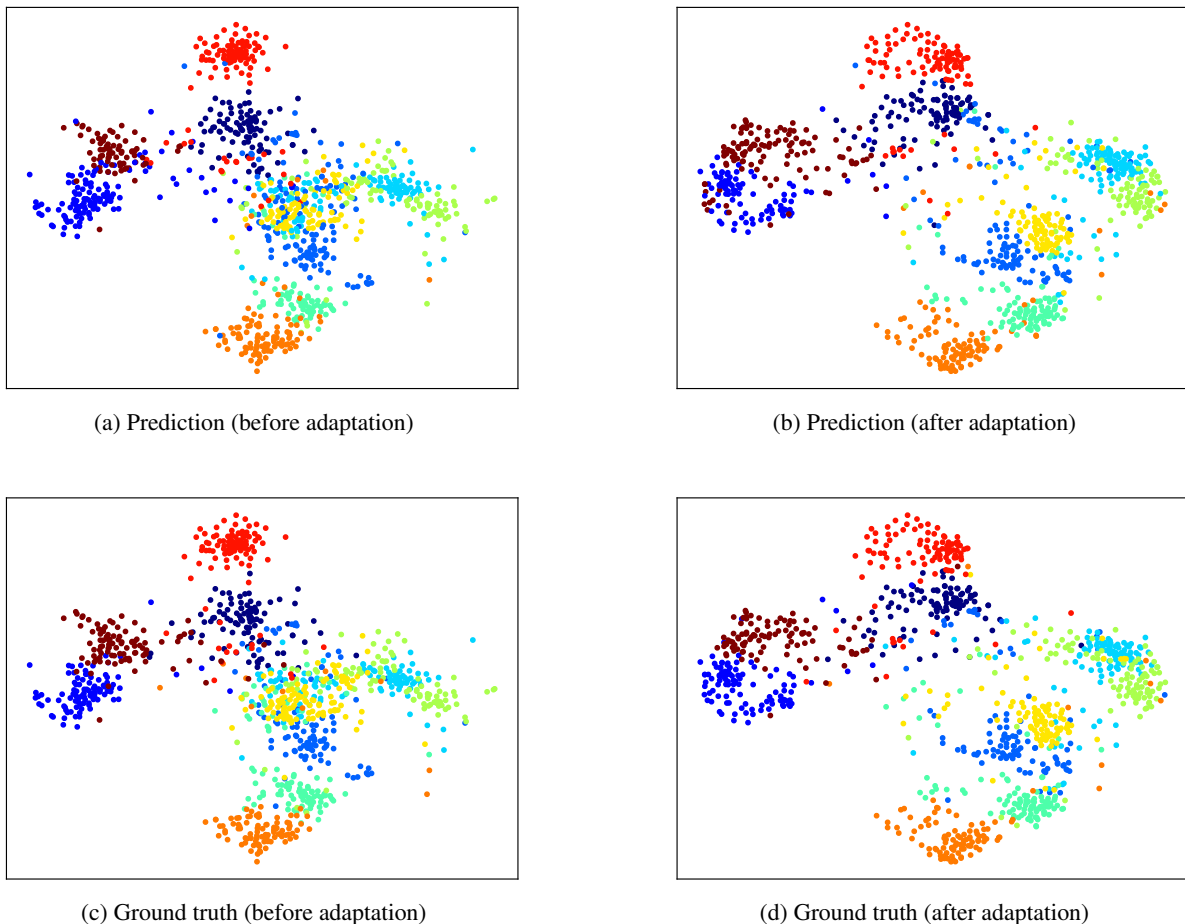

Figure 1. The t-SNE visualizations exhibit discernible attributes of brightness within the visual features derived from CLIPArTT. Panels (a) and (b) present the model’s predictions before and after 10 iterations of adaptation, respectively. Panels (c) and (d) demonstrate the actual labels in the absence of adaptation and following adaptation of the representations, respectively.

in Table 1).

It can be observed that TENT shows a higher robustness to class imbalance, as for each prediction, it depends less on the other images’ predictions (i.e., induction). Interestingly, we observe a trend where TENT’s performance decrease when more classes are present (e.g.,  $C=5$  instead of  $C=2$ ), whereas CLIPArTT increase its performance as  $C$  grows.

### 3.2. Open-Set classification

Another interesting scenario is open-set classification, where images from classes that are not considered are present in the batch. These images could potentially affect performance, specially in transductive methods and particularly in CLIPArTT, as the image-to-image and text-to-text similarities are combined. The only available text prompts are wrongly assigned to the out-of-distribution (OOD) samples.

To measure the effectiveness of our method in this scenario, we utilize SVHN-C, a corrupted version of the SVHN [3] dataset, analogous to CIFAR-10.C. For each batch of 128 image, 128 additional OOD images are included. Both parts are used at the same time for adaptation, and accuracy is only measured on the first half.

As seen in Table 2, CLIPArTT defeats TENT’s open-set accuracy by a significant margin. This encouraging result suggests that our method is robust to semantic out-of-distribution perturbations.

### 3.3. Generalization after adaptation

In TTA, the classification performance is evaluated directly on the adapted set of images in an episodic manner. However, a high accuracy on this set does not necessarily guarantee a good performance in a separate set of images unknown to the model.

|                   | CLIPArTT |       |       |       | TENT  |       |       |       |
|-------------------|----------|-------|-------|-------|-------|-------|-------|-------|
|                   | 2        | 3     | 4     | 5     | 2     | 3     | 4     | 5     |
| Original          | 76.99    | 81.12 | 84.37 | 86.92 | 97.07 | 96.14 | 95.27 | 94.09 |
| CIFAR-10.1        | 74.21    | 78.96 | 82.57 | 85.14 | 96.47 | 94.33 | 92.56 | 90.68 |
| Gaussian Noise    | 47.12    | 50.83 | 54.18 | 58.63 | 63.76 | 49.49 | 49.92 | 47.15 |
| Shot Noise        | 48.67    | 53.30 | 56.37 | 60.24 | 69.89 | 55.83 | 56.68 | 53.55 |
| Impulse Noise     | 45.98    | 49.82 | 53.15 | 57.48 | 66.87 | 54.47 | 54.77 | 52.88 |
| Defocus Blur      | 60.80    | 67.78 | 71.24 | 74.85 | 89.19 | 85.39 | 83.05 | 81.44 |
| Glass Blur        | 47.82    | 53.07 | 56.45 | 60.12 | 77.11 | 65.34 | 62.72 | 58.78 |
| Motion Blur       | 60.85    | 66.82 | 70.67 | 73.43 | 83.33 | 79.88 | 79.28 | 75.89 |
| Zoom Blur         | 56.78    | 66.52 | 70.43 | 72.94 | 86.88 | 84.15 | 81.89 | 81.35 |
| Snow              | 59.20    | 66.38 | 71.29 | 73.97 | 91.84 | 87.60 | 85.32 | 82.45 |
| Frost             | 60.02    | 68.08 | 72.12 | 75.15 | 92.50 | 88.62 | 86.18 | 84.25 |
| Fog               | 58.57    | 66.11 | 70.54 | 73.12 | 91.26 | 87.01 | 84.07 | 83.12 |
| Brightness        | 72.29    | 77.62 | 80.75 | 83.55 | 95.45 | 93.82 | 92.29 | 91.15 |
| Contrast          | 62.18    | 71.68 | 75.08 | 77.64 | 89.75 | 87.11 | 85.72 | 83.25 |
| Elastic Transform | 50.85    | 58.91 | 62.12 | 65.12 | 88.17 | 82.05 | 78.13 | 76.05 |
| Pixelate          | 51.75    | 57.20 | 60.42 | 63.08 | 77.35 | 71.38 | 69.22 | 66.85 |
| JPEG Compression  | 49.63    | 56.08 | 59.32 | 62.05 | 79.98 | 72.34 | 69.85 | 68.17 |

Table 1. Accuracy on imbalance datasets with different numbers of available classes at each batch.

|                   | CLIPArTT         | TENT              |
|-------------------|------------------|-------------------|
| Gaussian Noise    | 59.72 $\pm$ 0.05 | 41.27 $\pm$ 0.03  |
| Shot Noise        | 62.11 $\pm$ 0.07 | 48.14 $\pm$ 0.05  |
| Impulse Noise     | 55.23 $\pm$ 0.10 | 47.86 $\pm$ 0.07  |
| Defocus Blur      | 75.44 $\pm$ 0.07 | 72.03 $\pm$ 0.05  |
| Glass Blur        | 60.12 $\pm$ 0.07 | 42.08 $\pm$ 0.08  |
| Motion Blur       | 74.60 $\pm$ 0.05 | 65.71 $\pm$ 0.05  |
| Zoom Blur         | 76.15 $\pm$ 0.05 | 71.45 $\pm$ 0.06  |
| Snow              | 74.69 $\pm$ 0.05 | 73.99 $\pm$ 0.08  |
| Frost             | 77.72 $\pm$ 0.05 | 74.49 $\pm$ 0.09  |
| Fog               | 72.87 $\pm$ 0.03 | 70.57 $\pm$ 0.04  |
| Brightness        | 85.70 $\pm$ 0.09 | 82.34 $\pm$ 0.05  |
| Contrast          | 76.49 $\pm$ 0.04 | 71.67 $\pm$ 0.04  |
| Elastic Transform | 67.42 $\pm$ 0.01 | 65.99 $\pm$ 0.12  |
| Pixelate          | 62.02 $\pm$ 0.11 | 54.25 $\pm$ 0.08  |
| JPEG Compression  | 60.81 $\pm$ 0.07 | 54.09 $\pm$ 0.10  |
| Average           | 69.41 $\pm$ 8.86 | 62.40 $\pm$ 13.20 |

Table 2. Open-set accuracy on CIFAR-10-C when using SVHN-C as the OOD dataset.

Using a batch size of 160 images, we measure CLIPArTT’s generalization by separating 25% of each batch as a test-time validation split. The remaining 75% is used for adaptation prior to testing on the validation split. The accuracies on the adaptation split and the validation split are both reported and contrasted against TENT. Results are shown in Table 3.

While TENT obtains a higher accuracy on the adaptation splits of natural images (i.e., CIFAR-10 and CIFAR-10.1),

following a similar trend as in the main experiments’ results, the difference in the generalization accuracy is smaller with respect to CLIPArTT’s. Moreover, our method demonstrates a consistently better generalization and adaptation accuracy on corrupted samples, representing stronger domain shifts.

|                   | CLIPArTT                |                    | TENT              |                    |
|-------------------|-------------------------|--------------------|-------------------|--------------------|
|                   | Acc.                    | Acc. Gen.          | Acc.              | Acc. Gen.          |
| Original          | 95.43 $\pm$ 0.01        | 71.23 $\pm$ 0.0008 | 97.02 $\pm$ 0.02  | 72.68 $\pm$ 0.0023 |
| CIFAR-10.1        | 88.75 $\pm$ 0.85        | 65.87 $\pm$ 0.8083 | 90.49 $\pm$ 0.38  | 67.07 $\pm$ 1.1    |
| Gaussian Noise    | 63.79 $\pm$ 0.20        | 46.87 $\pm$ 0.0008 | 45.30 $\pm$ 0.05  | 30.83 $\pm$ 0.0030 |
| Shot Noise        | 66.38 $\pm$ 0.10        | 79.80 $\pm$ 0.0038 | 50.65 $\pm$ 0.18  | 35.85 $\pm$ 0.0025 |
| Impulse Noise     | 59.31 $\pm$ 0.19        | 44.56 $\pm$ 0.0023 | 51.91 $\pm$ 0.20  | 37.99 $\pm$ 0.0037 |
| Defocus Blur      | 81.26 $\pm$ 0.03        | 60.13 $\pm$ 0.0016 | 84.48 $\pm$ 0.07  | 60.32 $\pm$ 0.0028 |
| Glass Blur        | 65.38 $\pm$ 0.04        | 49.47 $\pm$ 0.0020 | 56.68 $\pm$ 0.26  | 41.32 $\pm$ 0.0035 |
| Motion Blur       | 80.41 $\pm$ 0.12        | 60.08 $\pm$ 0.0022 | 75.70 $\pm$ 0.13  | 55.72 $\pm$ 0.0013 |
| Zoom Blur         | 81.97 $\pm$ 0.05        | 60.63 $\pm$ 0.0009 | 81.14 $\pm$ 0.13  | 59.33 $\pm$ 0.0007 |
| Snow              | 82.06 $\pm$ 0.14        | 60.83 $\pm$ 0.0014 | 83.08 $\pm$ 0.13  | 61.08 $\pm$ 0.0008 |
| Frost             | 83.85 $\pm$ 0.19        | 61.73 $\pm$ 0.0009 | 84.70 $\pm$ 0.11  | 66.75 $\pm$ 0.0006 |
| Fog               | 90.04 $\pm$ 0.27        | 59.48 $\pm$ 0.0027 | 81.56 $\pm$ 0.09  | 60.69 $\pm$ 0.0033 |
| Brightness        | 91.73 $\pm$ 0.04        | 68.01 $\pm$ 0.0017 | 92.93 $\pm$ 0.03  | 68.80 $\pm$ 0.0018 |
| Contrast          | 82.63 $\pm$ 0.07        | 61.28 $\pm$ 0.0025 | 83.53 $\pm$ 0.06  | 62.97 $\pm$ 0.0009 |
| Elastic Transform | 74.04 $\pm$ 0.22        | 54.87 $\pm$ 0.0011 | 74.08 $\pm$ 0.10  | 54.92 $\pm$ 0.0009 |
| Pixelate          | 70.58 $\pm$ 0.02        | 51.53 $\pm$ 0.0042 | 67.35 $\pm$ 0.18  | 50.19 $\pm$ 0.0004 |
| JPEG Compression  | 67.32 $\pm$ 0.06        | 49.56 $\pm$ 0.0023 | 66.25 $\pm$ 0.14  | 48.85 $\pm$ 0.0021 |
| Average           | <b>75.38</b> $\pm$ 9.04 | 55.92 $\pm$ 6.62   | 71.78 $\pm$ 14.14 | 52.77 $\pm$ 11.10  |

Table 3. Generalization results on CIFAR-10 variants. Each batch is divided into an adaptation split and a validation split. Accuracy (Acc.) is measured on the former after adaptation, whilst the generalization accuracy (Acc. Gen.) is measured on the later.

## 4. Computational Cost

In this section, we compare the computational cost of CLIPArTT with other TTA methods through a thorough evaluation under consistent conditions, using an NVIDIA A6000 GPU within the same Python environment. The provided table 4 compares adaptation time, memory usage, and the number of learnable parameters across various TTA methods, including our proposed CLIPArTT. The results demonstrate that CLIPArTT maintains competitive adaptation time and memory usage relative to other approaches, such as TENT and TPT.

## 5. Comprehensive experimental results

We present comprehensive tables containing all the detailed information about results that was summarized in the main paper.

## References

- [1] Dan Hendrycks and Thomas Dietterich. Benchmarking neural network robustness to common corruptions and perturbations. 2019.
- [2] Da Li, Yongxin Yang, Yi-Zhe Song, and Timothy M Hospedales. Deeper, broader and artier domain generalization. In *Proceedings of the IEEE international conference on computer vision*, pages 5542–5550, 2017.
- [3] Yuval Netzer, Tao Wang, Adam Coates, Alessandro Bissacco, Bo Wu, and Andrew Y. Ng. Reading digits in natural im-

ages with unsupervised feature learning. In *NIPS Workshop on Deep Learning and Unsupervised Feature Learning 2011*, 2011.

- [4] Xingchao Peng, Ben Usman, Neela Kaushik, Dequan Wang, Judy Hoffman, and Kate Saenko. Visda: A synthetic-to-real benchmark for visual domain adaptation. In *Proceedings of the IEEE Conference on Computer Vision and Pattern Recognition (CVPR) Workshops*, June 2018.
- [5] Hemant Venkateswara, Jose Eusebio, Shayok Chakraborty, and Sethuraman Panchanathan. Deep hashing network for unsupervised domain adaptation. In *Proceedings of the IEEE Conference on Computer Vision and Pattern Recognition*, pages 5018–5027, 2017.

| Method   | Adaptation Time | Memory | Pct. of Learnable Parameters |
|----------|-----------------|--------|------------------------------|
| TENT     | 0.28 s          | 1.5 GB | 0.026%                       |
| TPT      | 0.26 s          | 1.7 GB | 0.001%                       |
| CLIPArTT | 0.55 s          | 1.7 GB | 0.026%                       |

Table 4. Comparison of Computational Cost.

|                   | CIFAR10 |        | CIFAR100 |       |
|-------------------|---------|--------|----------|-------|
|                   | Top 1   | Top 3  | Top 1    | Top 3 |
| Original          | 88.74   | 100.00 | 61.68    | 97.34 |
| Gaussian Noise    | 35.27   | 99.87  | 14.8     | 63.66 |
| Shot noise        | 39.67   | 99.99  | 16.03    | 67.02 |
| Impulse Noise     | 42.61   | 100.00 | 13.85    | 64.4  |
| Defocus blur      | 69.76   | 100.00 | 36.74    | 90.14 |
| Glass blur        | 42.40   | 100.00 | 14.19    | 61.66 |
| Motion blur       | 63.97   | 100.00 | 36.14    | 90.36 |
| Zoom blur         | 69.83   | 100.00 | 40.24    | 91.27 |
| Snow              | 71.78   | 100.00 | 38.95    | 91.40 |
| Frost             | 72.86   | 100.00 | 40.56    | 92.23 |
| Fog               | 67.04   | 99.98  | 38.00    | 91.51 |
| Brightness        | 81.87   | 100.00 | 48.18    | 93.10 |
| Contrast          | 64.37   | 100.00 | 29.53    | 84.67 |
| Elastic transform | 60.83   | 100.00 | 26.33    | 78.96 |
| Pixelate          | 50.53   | 100.00 | 21.98    | 75.65 |
| JPEG compression  | 55.48   | 100.00 | 25.91    | 80.81 |
| Average           | 59.22   | 99.99  | 29.43    | 81.12 |

Table 5. Accuracy (%) on CIFAR-10/100 and CIFAR-10/100-C datasets with Level 5 corruption for the top 1 or the top 3 predicted classes.

|                   | K = 1            | K = 3            | K = 4            |
|-------------------|------------------|------------------|------------------|
| Original          | 89.8 $\pm$ 0.05  | 90.04 $\pm$ 0.13 | 90.41 $\pm$ 0.07 |
| CIFAR 10.1        | 85.37 $\pm$ 0.17 | 86.35 $\pm$ 0.27 | 86.07 $\pm$ 0.21 |
| Gaussian Noise    | 60.20 $\pm$ 0.24 | 59.90 $\pm$ 0.36 | 59.71 $\pm$ 0.15 |
| Shot noise        | 62.08 $\pm$ 0.11 | 62.77 $\pm$ 0.07 | 62.17 $\pm$ 0.16 |
| Impulse Noise     | 54.33 $\pm$ 0.07 | 56.02 $\pm$ 0.16 | 56.27 $\pm$ 0.15 |
| Defocus blur      | 77.16 $\pm$ 0.02 | 76.74 $\pm$ 0.05 | 76.79 $\pm$ 0.11 |
| Glass blur        | 61.91 $\pm$ 0.15 | 61.77 $\pm$ 0.16 | 61.72 $\pm$ 0.23 |
| Motion blur       | 74.94 $\pm$ 0.15 | 76.01 $\pm$ 0.19 | 76.33 $\pm$ 0.10 |
| Zoom blur         | 76.84 $\pm$ 0.13 | 77.40 $\pm$ 0.20 | 77.15 $\pm$ 0.04 |
| Snow              | 76.87 $\pm$ 0.05 | 77.29 $\pm$ 0.16 | 76.56 $\pm$ 0.16 |
| Frost             | 77.81 $\pm$ 0.04 | 79.20 $\pm$ 0.08 | 78.42 $\pm$ 0.04 |
| Fog               | 75.83 $\pm$ 0.28 | 75.74 $\pm$ 0.14 | 75.65 $\pm$ 0.06 |
| Brightness        | 85.55 $\pm$ 0.12 | 86.59 $\pm$ 0.16 | 86.83 $\pm$ 0.10 |
| Contrast          | 78.02 $\pm$ 0.18 | 77.82 $\pm$ 0.14 | 78.27 $\pm$ 0.14 |
| Elastic transform | 69.42 $\pm$ 0.07 | 70.20 $\pm$ 0.01 | 69.81 $\pm$ 0.20 |
| Pixelate          | 66.07 $\pm$ 0.09 | 66.52 $\pm$ 0.13 | 66.45 $\pm$ 0.08 |
| JPEG compression  | 64.82 $\pm$ 0.26 | 63.51 $\pm$ 0.14 | 62.72 $\pm$ 0.25 |
| Average           | 70.79            | 71.17            | 70.99            |

Table 6. Accuracy (%) on CIFAR-10, CIFAR-10.1 and CIFAR-10-C datasets with Level 5 corruption for different number of K selected classes to create pseudo-label.

|                   | $K=1$                              | $K=3$                              | $K=5$                              | $K=7$            | $K=10$                             | $K=20$                             |
|-------------------|------------------------------------|------------------------------------|------------------------------------|------------------|------------------------------------|------------------------------------|
| Original          | 69.00 $\pm$ 0.22                   | 69.79 $\pm$ 0.04                   | 69.68 $\pm$ 0.07                   | 69.56 $\pm$ 0.02 | 69.78 $\pm$ 0.02                   | <b>69.93 <math>\pm</math> 0.08</b> |
| Gaussian Noise    | <b>26.05 <math>\pm</math> 0.11</b> | 25.32 $\pm$ 0.14                   | 24.69 $\pm$ 0.03                   | 24.60 $\pm$ 0.03 | 24.70 $\pm$ 0.15                   | 23.73 $\pm$ 0.07                   |
| Shot noise        | <b>28.88 <math>\pm</math> 0.11</b> | 27.90 $\pm$ 0.05                   | 27.25 $\pm$ 0.26                   | 26.75 $\pm$ 0.07 | 26.83 $\pm$ 0.26                   | 25.73 $\pm$ 0.13                   |
| Impulse Noise     | 24.04 $\pm$ 0.09                   | <b>25.62 <math>\pm</math> 0.09</b> | 25.12 $\pm$ 0.14                   | 25.25 $\pm$ 0.14 | 24.95 $\pm$ 0.23                   | 24.57 $\pm$ 0.12                   |
| Defocus blur      | 49.03 $\pm$ 0.15                   | <b>49.88 <math>\pm</math> 0.23</b> | 49.75 $\pm$ 0.11                   | 49.74 $\pm$ 0.25 | 49.62 $\pm$ 0.10                   | 49.49 $\pm$ 0.07                   |
| Glass blur        | 26.77 $\pm$ 0.14                   | <b>27.89 <math>\pm</math> 0.03</b> | 27.76 $\pm$ 0.23                   | 27.28 $\pm$ 0.07 | 26.57 $\pm$ 0.07                   | 25.52 $\pm$ 0.09                   |
| Motion blur       | 46.50 $\pm$ 0.09                   | <b>47.93 <math>\pm</math> 0.14</b> | 47.48 $\pm$ 0.21                   | 47.57 $\pm$ 0.10 | 47.53 $\pm$ 0.09                   | 47.36 $\pm$ 0.09                   |
| Zoom blur         | 52.08 $\pm$ 0.12                   | 52.70 $\pm$ 0.06                   | 52.22 $\pm$ 0.10                   | 52.10 $\pm$ 0.24 | 52.62 $\pm$ 0.24                   | <b>52.82 <math>\pm</math> 0.09</b> |
| Snow              | 49.24 $\pm$ 0.07                   | <b>49.72 <math>\pm</math> 0.01</b> | 48.98 $\pm$ 0.08                   | 48.87 $\pm$ 0.08 | 49.13 $\pm$ 0.08                   | 49.54 $\pm$ 0.13                   |
| Frost             | <b>49.91 <math>\pm</math> 0.07</b> | 49.63 $\pm$ 0.12                   | 48.43 $\pm$ 0.17                   | 48.11 $\pm$ 0.06 | 48.72 $\pm$ 0.08                   | 49.13 $\pm$ 0.10                   |
| Fog               | 47.15 $\pm$ 0.04                   | 48.77 $\pm$ 0.04                   | 48.95 $\pm$ 0.18                   | 48.78 $\pm$ 0.22 | <b>49.06 <math>\pm</math> 0.05</b> | 48.74 $\pm$ 0.36                   |
| Brightness        | 60.01 $\pm$ 0.08                   | <b>61.27 <math>\pm</math> 0.08</b> | 60.77 $\pm$ 0.16                   | 60.89 $\pm$ 0.19 | 60.98 $\pm$ 0.18                   | 61.03 $\pm$ 0.19                   |
| Contrast          | 46.90 $\pm$ 0.21                   | <b>48.55 <math>\pm</math> 0.24</b> | 49.01 $\pm$ 0.14                   | 49.07 $\pm$ 0.03 | <b>49.27 <math>\pm</math> 0.09</b> | 49.08 $\pm$ 0.12                   |
| Elastic transform | 36.32 $\pm$ 0.10                   | 37.45 $\pm$ 0.08                   | <b>37.63 <math>\pm</math> 0.12</b> | 37.31 $\pm$ 0.09 | 37.13 $\pm$ 0.16                   | 36.94 $\pm$ 0.11                   |
| Pixelate          | 32.52 $\pm$ 0.17                   | 33.88 $\pm$ 0.14                   | 34.40 $\pm$ 0.15                   | 34.38 $\pm$ 0.16 | <b>34.65 <math>\pm</math> 0.09</b> | 34.32 $\pm$ 0.02                   |
| JPEG compression  | 35.81 $\pm$ 0.11                   | <b>36.07 <math>\pm</math> 0.32</b> | 35.77 $\pm$ 0.01                   | 35.60 $\pm$ 0.10 | 35.63 $\pm$ 0.10                   | 35.29 $\pm$ 0.14                   |
| Average           | 40.75                              | <b>41.51</b>                       | 41.21                              | 41.09            | 41.16                              | 40.89                              |

Table 7. Accuracy (%) on CIFAR-100 and CIFAR-100-C datasets with Level 5 corruption for different number of  $K$  selected classes to create pseudo-labels.

|                   | Iter = 1         | Iter = 5                           | Iter = 10                          | Iter = 20                          |
|-------------------|------------------|------------------------------------|------------------------------------|------------------------------------|
| Original          | 89.59 $\pm$ 0.01 | <b>90.54 <math>\pm</math> 0.09</b> | 90.04 $\pm$ 0.13                   | 88.32 $\pm$ 0.12                   |
| CIFAR 10.1        | 84.78 $\pm$ 0.02 | <b>86.67 <math>\pm</math> 0.06</b> | 86.35 $\pm$ 0.27                   | 84.33 $\pm$ 0.31                   |
| Gaussian Noise    | 39.75 $\pm$ 0.04 | 53.79 $\pm$ 0.08                   | <b>59.90 <math>\pm</math> 0.36</b> | 59.33 $\pm$ 0.20                   |
| Shot noise        | 43.80 $\pm$ 0.04 | 57.16 $\pm$ 0.24                   | 62.77 $\pm$ 0.07                   | <b>63.08 <math>\pm</math> 0.43</b> |
| Impulse Noise     | 45.19 $\pm$ 0.07 | 52.44 $\pm$ 0.14                   | 56.02 $\pm$ 0.16                   | <b>56.73 <math>\pm</math> 0.01</b> |
| Defocus blur      | 72.93 $\pm$ 0.07 | 76.36 $\pm$ 0.10                   | <b>76.74 <math>\pm</math> 0.05</b> | 75.33 $\pm$ 0.13                   |
| Glass blur        | 46.61 $\pm$ 0.06 | 57.45 $\pm$ 0.13                   | 61.77 $\pm$ 0.16                   | <b>62.01 <math>\pm</math> 0.27</b> |
| Motion blur       | 67.89 $\pm$ 0.03 | 74.34 $\pm$ 0.14                   | <b>76.01 <math>\pm</math> 0.19</b> | 75.94 $\pm$ 0.28                   |
| Zoom blur         | 73.24 $\pm$ 0.05 | 77.03 $\pm$ 0.07                   | <b>77.40 <math>\pm</math> 0.20</b> | 75.42 $\pm$ 0.13                   |
| Snow              | 73.81 $\pm$ 0.07 | 76.51 $\pm$ 0.08                   | <b>77.29 <math>\pm</math> 0.16</b> | 76.18 $\pm$ 0.21                   |
| Frost             | 74.80 $\pm$ 0.04 | 78.13 $\pm$ 0.12                   | <b>79.20 <math>\pm</math> 0.08</b> | 77.44 $\pm$ 0.30                   |
| Fog               | 69.81 $\pm$ 0.06 | 74.16 $\pm$ 0.09                   | <b>75.74 <math>\pm</math> 0.14</b> | 74.66 $\pm$ 0.02                   |
| Brightness        | 84.16 $\pm$ 0.01 | <b>86.61 <math>\pm</math> 0.10</b> | 86.59 $\pm$ 0.16                   | 85.14 $\pm$ 0.42                   |
| Contrast          | 67.75 $\pm$ 0.03 | 74.85 $\pm$ 0.04                   | <b>77.82 <math>\pm</math> 0.14</b> | 77.75 $\pm$ 0.11                   |
| Elastic transform | 63.15 $\pm$ 0.08 | 68.53 $\pm$ 0.19                   | <b>70.20 <math>\pm</math> 0.01</b> | 68.48 $\pm$ 0.24                   |
| Pixelate          | 54.20 $\pm$ 0.02 | 61.87 $\pm$ 0.04                   | 66.52 $\pm$ 0.13                   | <b>67.13 <math>\pm</math> 0.15</b> |
| JPEG compression  | 57.46 $\pm$ 0.09 | 62.00 $\pm$ 0.13                   | 63.51 $\pm$ 0.14                   | <b>63.64 <math>\pm</math> 0.20</b> |
| Average           | 62.30            | 68.75                              | <b>71.17</b>                       | 70.55                              |

Table 8. Accuracy (%) on CIFAR-10, CIFAR-10.1 and CIFAR-10-C datasets with Level 5 corruption for different number of iterations to update the model at test-time.

|                   | Image              | Text        | Image + Text       |
|-------------------|--------------------|-------------|--------------------|
| Original          | <b>90.18 ±0.02</b> | 89.05 ±0.14 | 90.04 ±0.13        |
| CIFAR 10.1        | 86.25 ±0.37        | 84.85 ±0.40 | <b>86.35 ±0.27</b> |
| Gaussian Noise    | 59.05 ±0.30        | 59.29 ±0.27 | <b>59.90 ±0.36</b> |
| Shot noise        | 62.11 ±0.18        | 61.89 ±0.31 | <b>62.77 ±0.07</b> |
| Impulse Noise     | 55.43 ±0.12        | 55.48 ±0.10 | <b>56.02 ±0.16</b> |
| Defocus blur      | 76.88 ±0.09        | 76.25 ±0.10 | <b>76.74 ±0.05</b> |
| Glass blur        | 61.56 ±0.03        | 61.28 ±0.33 | <b>61.77 ±0.16</b> |
| Motion blur       | <b>76.32 ±0.15</b> | 75.37 ±0.27 | 76.01 ±0.19        |
| Zoom blur         | <b>77.66 ±0.09</b> | 76.29 ±0.11 | 77.40 ±0.20        |
| Snow              | 77.28 ±0.08        | 76.03 ±0.16 | <b>77.29 ±0.16</b> |
| Frost             | 78.80 ±0.18        | 78.05 ±0.21 | <b>79.20 ±0.08</b> |
| Fog               | 75.69 ±0.17        | 73.70 ±0.15 | <b>75.74 ±0.14</b> |
| Brightness        | <b>86.62 ±0.20</b> | 84.69 ±0.04 | 86.59 ±0.16        |
| Contrast          | 77.43 ±0.12        | 74.52 ±0.02 | <b>77.82 ±0.14</b> |
| Elastic transform | 69.63 ±0.02        | 69.33 ±0.20 | <b>70.20 ±0.01</b> |
| Pixelate          | 66.33 ±0.16        | 64.86 ±0.29 | <b>66.52 ±0.13</b> |
| JPEG compression  | <b>63.92 ±0.13</b> | 63.44 ±0.20 | 63.51 ±0.14        |
| Average           | 70.98              | 70.03       | <b>71.17</b>       |

Table 9. Accuracy (%) on CIFAR-10, CIFAR-10.1 and CIFAR-10-C datasets with different targets.

|                   | CLIP  | BS = 8      | BS = 16     | BS = 32     | BS = 64     | BS = 128    |
|-------------------|-------|-------------|-------------|-------------|-------------|-------------|
| Original          | 88.74 | 82.50 ±0.13 | 85.89 ±0.19 | 88.25 ±0.15 | 89.48 ±0.15 | 90.04 ±0.13 |
| CIFAR 10.1        | 83.25 | 77.2 ±0.92  | 81.55 ±0.53 | 84.00 ±0.31 | 85.40 ±0.08 | 86.35 ±0.27 |
| Gaussian Noise    | 35.27 | 47.30 ±0.37 | 50.91 ±0.35 | 54.23 ±0.28 | 57.89 ±0.13 | 59.90 ±0.36 |
| Shot noise        | 39.67 | 49.62 ±0.26 | 53.1 ±0.27  | 56.88 ±0.23 | 60.56 ±0.12 | 62.77 ±0.07 |
| Impulse Noise     | 42.61 | 47.24 ±0.22 | 50.24 ±0.48 | 52.7 ±0.21  | 54.88 ±0.17 | 56.02 ±0.16 |
| Defocus blur      | 69.76 | 68.24 ±0.35 | 72.22 ±0.04 | 75.09 ±0.16 | 75.97 ±0.27 | 76.74 ±0.05 |
| Glass blur        | 42.40 | 49.49 ±0.30 | 53.27 ±0.04 | 57.18 ±0.24 | 60.12 ±0.14 | 61.77 ±0.16 |
| Motion blur       | 63.97 | 65.22 ±0.06 | 69.02 ±0.30 | 72.54 ±0.27 | 74.71 ±0.18 | 76.01 ±0.19 |
| Zoom blur         | 69.83 | 67.69 ±0.20 | 71.33 ±0.11 | 74.53 ±0.11 | 76.35 ±0.07 | 77.40 ±0.20 |
| Snow              | 71.78 | 68.68 ±0.42 | 72.37 ±0.11 | 74.93 ±0.18 | 76.53 ±0.41 | 77.29 ±0.16 |
| Frost             | 72.86 | 70.35 ±0.25 | 73.93 ±0.34 | 76.81 ±0.23 | 78.22 ±0.13 | 79.20 ±0.08 |
| Fog               | 67.04 | 66.25 ±0.31 | 69.71 ±0.24 | 72.36 ±0.23 | 73.96 ±0.21 | 75.74 ±0.14 |
| Brightness        | 81.87 | 77.36 ±0.17 | 81.20 ±0.20 | 84.07 ±0.08 | 85.58 ±0.25 | 86.59 ±0.16 |
| Contrast          | 64.37 | 65.12 ±0.07 | 69.02 ±0.12 | 72.60 ±0.46 | 75.79 ±0.24 | 77.82 ±0.14 |
| Elastic transform | 60.83 | 59.61 ±0.11 | 63.67 ±0.13 | 66.36 ±0.26 | 68.74 ±0.07 | 70.20 ±0.01 |
| Pixelate          | 50.53 | 56.78 ±0.24 | 60.01 ±0.06 | 62.57 ±0.19 | 64.64 ±0.03 | 66.52 ±0.13 |
| JPEG compression  | 55.48 | 57.59 ±0.26 | 60.78 ±0.12 | 62.63 ±0.06 | 63.43 ±0.16 | 63.51 ±0.14 |
| Average           | 59.22 | 61.10       | 64.72       | 67.70       | 69.82       | 71.17       |

Table 10. Accuracy (%) on CIFAR-10, CIFAR-10.1 and CIFAR-10-C datasets with Level 5 corruption for different batch sizes.

|                   | CLIP  | TENT               | TPT (BS=32)  | CLIPArTT           |
|-------------------|-------|--------------------|--------------|--------------------|
| Original          | 89.25 | <b>92.75 ±0.17</b> | 89.80 ±0.05  | 92.61 ±0.05        |
| CIFAR 10.1        | 84.00 | 88.52 ±0.33        | 83.75.0.21 ± | <b>88.72 ±0.33</b> |
| Gaussian Noise    | 37.75 | 31.04 ±0.38        | 35.35 ±0.15  | <b>60.89 ±0.26</b> |
| Shot noise        | 41.10 | 40.54 ±0.41        | 41.03 ±0.19  | <b>65.19 ±0.21</b> |
| Impulse Noise     | 51.71 | 58.03 ±0.16        | 54.86 ±0.07  | <b>67.55 ±0.09</b> |
| Defocus blur      | 70.07 | 77.57 ±0.03        | 70.29 ±0.02  | <b>78.92 ±0.12</b> |
| Glass blur        | 42.24 | 47.16 ±0.05        | 37.86 ±0.17  | <b>57.18 ±0.20</b> |
| Motion blur       | 65.81 | 76.16 ±0.05        | 67.43 ±0.11  | <b>76.59 ±0.06</b> |
| Zoom blur         | 72.50 | <b>79.64 ±0.12</b> | 72.91 ±0.02  | 79.62 ±0.11        |
| Snow              | 73.23 | <b>81.68 ±0.03</b> | 72.98 ±0.32  | 81.13 ±0.29        |
| Frost             | 76.52 | <b>83.22 ±0.05</b> | 75.87 ±0.16  | 81.24 ±0.08        |
| Fog               | 68.35 | <b>80.78 ±0.15</b> | 69.13 ±0.27  | 78.47 ±0.19        |
| Brightness        | 83.36 | <b>89.85 ±0.11</b> | 83.67 ±0.14  | 88.66 ±0.15        |
| Contrast          | 61.90 | <b>79.24 ±0.19</b> | 62.16 ±0.06  | 75.15 ±0.07        |
| Elastic transform | 53.16 | 62.54 ±0.08        | 51.26 ±0.23  | <b>69.49 ±0.08</b> |
| Pixelate          | 48.48 | 67.08 ±0.24        | 44.65 ±0.21  | <b>71.80 ±0.16</b> |
| JPEG compression  | 56.05 | 65.42 ±0.05        | 56.73 ±0.07  | <b>66.42 ±0.25</b> |
| Average           | 60.15 | 68.00              | 59.75        | <b>73.22</b>       |

Table 11. Accuracy (%) on CIFAR-10, CIFAR-10.1 and CIFAR-10-C datasets with ViT-B/16 as visual encoder.

|                   | CLIP  | TENT               | TPT (BS=32) | CLIPArTT           |
|-------------------|-------|--------------------|-------------|--------------------|
| Original          | 95.36 | <b>96.13 ±0.06</b> | 95.18 ±0.02 | 95.16 ±0.03        |
| CIFAR 10.1        | 91.20 | <b>92.22 ±0.25</b> | 91.32 ±0.12 | 91.02 ±0.02        |
| Gaussian Noise    | 64.64 | 68.87 ±0.20        | 64.44 ±0.11 | <b>70.04 ±0.31</b> |
| Shot noise        | 67.82 | <b>71.95 ±0.06</b> | 66.81 ±0.19 | 71.44 ±0.16        |
| Impulse Noise     | 78.21 | <b>80.22 ±0.19</b> | 76.46 ±0.17 | 79.42 ±0.15        |
| Defocus blur      | 80.73 | <b>83.10 ±0.03</b> | 79.01 ±0.23 | 81.75 ±0.19        |
| Glass blur        | 50.29 | 57.12 ±0.07        | 49.64 ±0.23 | <b>58.13 ±0.23</b> |
| Motion blur       | 80.75 | <b>82.69 ±0.11</b> | 78.85 ±0.04 | 80.76 ±0.12        |
| Zoom blur         | 82.75 | <b>84.91 ±0.08</b> | 82.32 ±0.13 | 83.39 ±0.05        |
| Snow              | 83.01 | <b>85.99 ±0.11</b> | 82.69 ±0.10 | 84.48 ±0.07        |
| Frost             | 84.90 | <b>87.15 ±0.12</b> | 84.63 ±0.08 | 85.21 ±0.06        |
| Fog               | 78.44 | <b>81.30 ±0.07</b> | 77.56 ±0.17 | 79.27 ±0.07        |
| Brightness        | 91.67 | <b>93.07 ±0.04</b> | 90.94 ±0.04 | 91.87 ±0.09        |
| Contrast          | 84.20 | <b>87.93 ±0.04</b> | 82.88 ±0.09 | 86.19 ±0.06        |
| Elastic transform | 65.45 | <b>69.96 ±0.12</b> | 64.81 ±0.14 | 67.43 ±0.24        |
| Pixelate          | 75.10 | <b>77.89 ±0.05</b> | 72.92 ±0.12 | 77.11 ±0.10        |
| JPEG compression  | 72.58 | <b>75.49 ±0.07</b> | 71.18 ±0.19 | 74.46 ±0.11        |
| Average           | 76.04 | <b>79.18</b>       | 75.01       | 78.06              |

Table 12. Accuracy (%) on CIFAR-10, CIFAR-10.1 and CIFAR-10-C datasets with ViT-L/14 as visual encoder.



|                   | CLIP  | TENT               | TPT (BS=32)        | CLIPArTT           |
|-------------------|-------|--------------------|--------------------|--------------------|
| Original          | 64.76 | <b>71.73 ±0.14</b> | 67.15 ±0.23        | 71.34 ±0.07        |
| Gaussian Noise    | 15.88 | 12.28 ±0.20        | 15.43 ±0.03        | <b>19.01 ±0.24</b> |
| Shot noise        | 17.49 | 15.07 ±0.21        | 16.88 ±0.07        | <b>20.27 ±0.21</b> |
| Impulse Noise     | 21.43 | 13.13 ±0.16        | <b>22.12 ±0.15</b> | 17.66 ±0.10        |
| Defocus blur      | 40.10 | <b>50.35 ±0.03</b> | 41.08 ±0.22        | 49.86 ±0.13        |
| Glass blur        | 13.48 | 4.84 ±0.14         | <b>18.43 ±0.15</b> | 18.34 ±0.31        |
| Motion blur       | 39.82 | 49.85 ±0.37        | 40.85 ±0.26        | <b>50.00 ±0.09</b> |
| Zoom blur         | 45.45 | <b>54.76 ±0.04</b> | 46.77 ±0.06        | 54.13 ±0.08        |
| Snow              | 42.77 | 52.38 ±0.18        | 47.24 ±0.18        | <b>52.80 ±0.27</b> |
| Frost             | 45.39 | <b>51.66 ±0.04</b> | 48.61 ±0.14        | 49.56 ±0.08        |
| Fog               | 38.98 | <b>50.74 ±0.14</b> | 39.92 ±0.16        | 49.92 ±0.11        |
| Brightness        | 52.55 | <b>64.26 ±0.09</b> | 55.83 ±0.10        | 63.76 ±0.13        |
| Contrast          | 33.32 | <b>48.69 ±0.08</b> | 33.13 ±0.16        | 47.86 ±0.02        |
| Elastic transform | 24.39 | <b>33.56 ±0.28</b> | 27.36 ±0.10        | 32.93 ±0.23        |
| Pixelate          | 21.89 | 36.20 ±0.28        | 21.26 ±0.10        | <b>39.49 ±0.21</b> |
| JPEG compression  | 27.21 | 30.80 ±0.05        | 30.97 ±0.10        | <b>35.56 ±0.23</b> |
| Average           | 32.01 | 37.90              | 33.73              | <b>40.08</b>       |

Table 13. Accuracy (%) on CIFAR-100 and CIFAR-100-C datasets with ViT-B/16 as visual encoder.

|                   | CLIP  | TENT        | TPT (BS=16) | CLIPArTT           |
|-------------------|-------|-------------|-------------|--------------------|
| Original          | 73.28 | 78.03 ±0.08 | 76.85 ±0.06 | <b>79.42 ±0.08</b> |
| Gaussian Noise    | 30.55 | 36.93 ±0.03 | 36.10 ±0.11 | <b>41.46 ±0.15</b> |
| Shot noise        | 34.58 | 40.96 ±0.16 | 38.23 ±0.13 | <b>44.27 ±0.09</b> |
| Impulse Noise     | 44.89 | 49.09 ±0.14 | 49.69 ±0.21 | <b>51.44 ±0.23</b> |
| Defocus blur      | 48.88 | 55.23 ±0.07 | 50.43 ±0.19 | <b>56.55 ±0.22</b> |
| Glass blur        | 23.46 | 27.02 ±0.23 | 24.35 ±0.22 | <b>30.47 ±0.14</b> |
| Motion blur       | 50.83 | 56.03 ±0.20 | 51.94 ±0.04 | <b>56.98 ±0.18</b> |
| Zoom blur         | 56.02 | 61.19 ±0.10 | 56.96 ±0.16 | <b>62.56 ±0.04</b> |
| Snow              | 49.03 | 55.60 ±0.09 | 54.89 ±0.11 | <b>58.81 ±0.11</b> |
| Frost             | 53.27 | 58.21 ±0.15 | 58.15 ±0.33 | <b>60.38 ±0.23</b> |
| Fog               | 48.51 | 53.37 ±0.25 | 49.26 ±0.13 | <b>54.38 ±0.04</b> |
| Brightness        | 60.53 | 67.34 ±0.17 | 66.60 ±0.10 | <b>69.63 ±0.14</b> |
| Contrast          | 50.24 | 59.91 ±0.13 | 53.64 ±0.24 | <b>63.39 ±0.13</b> |
| Elastic transform | 35.07 | 38.49 ±0.12 | 35.72 ±0.09 | <b>39.57 ±0.39</b> |
| Pixelate          | 43.86 | 48.37 ±0.17 | 44.32 ±0.10 | <b>50.45 ±0.16</b> |
| JPEG compression  | 39.11 | 44.42 ±0.09 | 43.44 ±0.11 | <b>47.45 ±0.14</b> |
| Average           | 44.59 | 50.14       | 47.58       | <b>52.52</b>       |

Table 14. Accuracy (%) on CIFAR-100 and CIFAR-100-C datasets with ViT-L/14 as visual encoder.

|                   | CLIP  | LAME             | TENT                              | TPT (BS=32)      | CLIPArTT                          |
|-------------------|-------|------------------|-----------------------------------|------------------|-----------------------------------|
| Original          | 88.74 | 89.36 $\pm$ 0.06 | <b>91.69 <math>\pm</math>0.10</b> | 88.06 $\pm$ 0.06 | 90.04 $\pm$ 0.13                  |
| CIFAR 10.1        | 83.25 | 81.22 $\pm$ 0.33 | <b>87.60 <math>\pm</math>0.45</b> | 81.80 $\pm$ 0.27 | 86.35 $\pm$ 0.27                  |
| Gaussian Noise    | 35.27 | 24.71 $\pm$ 0.11 | 41.27 $\pm$ 0.27                  | 33.90 $\pm$ 0.08 | <b>59.90 <math>\pm</math>0.36</b> |
| Shot noise        | 39.67 | 27.44 $\pm$ 0.09 | 47.20 $\pm$ 0.23                  | 38.20 $\pm$ 0.02 | <b>62.77 <math>\pm</math>0.07</b> |
| Impulse Noise     | 42.61 | 31.38 $\pm$ 0.15 | 48.58 $\pm$ 0.31                  | 37.66 $\pm$ 0.20 | <b>56.02 <math>\pm</math>0.16</b> |
| Defocus blur      | 69.76 | 62.45 $\pm$ 0.44 | <b>77.12 <math>\pm</math>0.16</b> | 67.83 $\pm$ 0.28 | 76.74 $\pm$ 0.05                  |
| Glass blur        | 42.40 | 29.96 $\pm$ 0.06 | 52.65 $\pm$ 0.30                  | 38.81 $\pm$ 0.12 | <b>61.77 <math>\pm</math>0.16</b> |
| Motion blur       | 63.97 | 54.00 $\pm$ 0.36 | 71.25 $\pm$ 0.09                  | 63.39 $\pm$ 0.13 | <b>76.01 <math>\pm</math>0.19</b> |
| Zoom blur         | 69.83 | 61.97 $\pm$ 0.36 | 76.20 $\pm$ 0.19                  | 68.95 $\pm$ 0.16 | <b>77.40 <math>\pm</math>0.20</b> |
| Snow              | 71.78 | 64.61 $\pm$ 0.48 | <b>78.29 <math>\pm</math>0.20</b> | 70.16 $\pm$ 0.10 | 77.29 $\pm$ 0.16                  |
| Frost             | 72.86 | 65.17 $\pm$ 0.17 | <b>79.84 <math>\pm</math>0.09</b> | 72.39 $\pm$ 0.22 | 79.20 $\pm$ 0.08                  |
| Fog               | 67.04 | 59.13 $\pm$ 0.49 | <b>77.39 <math>\pm</math>0.01</b> | 64.31 $\pm$ 0.28 | 75.74 $\pm$ 0.14                  |
| Brightness        | 81.87 | 80.05 $\pm$ 0.23 | <b>87.78 <math>\pm</math>0.03</b> | 81.30 $\pm$ 0.18 | 86.59 $\pm$ 0.16                  |
| Contrast          | 64.37 | 56.91 $\pm$ 0.37 | <b>79.47 <math>\pm</math>0.11</b> | 62.26 $\pm$ 0.31 | 77.82 $\pm$ 0.14                  |
| Elastic transform | 60.83 | 53.89 $\pm$ 0.20 | 70.00 $\pm$ 0.25                  | 56.43 $\pm$ 0.27 | <b>70.20 <math>\pm</math>0.01</b> |
| Pixelate          | 50.53 | 39.67 $\pm$ 0.34 | 63.74 $\pm$ 0.18                  | 42.80 $\pm$ 0.40 | <b>66.52 <math>\pm</math>0.13</b> |
| JPEG compression  | 55.48 | 47.24 $\pm$ 0.14 | 62.64 $\pm$ 0.14                  | 53.67 $\pm$ 0.25 | <b>63.51 <math>\pm</math>0.14</b> |
| Average           | 59.22 | 50.57            | 67.56                             | 56.80            | <b>71.17</b>                      |

Table 15. Accuracy (%) on CIFAR-10, CIFAR-10.1 and CIFAR-10-C datasets with ViT-B/32 as visual encoder.

|                   | CLIP  | LAME             | TENT             | TPT (BS=32)      | CLIPArTT                          |
|-------------------|-------|------------------|------------------|------------------|-----------------------------------|
| Original          | 61.68 | 58.27 $\pm$ 0.17 | 69.74 $\pm$ 0.16 | 63.78 $\pm$ 0.28 | <b>69.79 <math>\pm</math>0.04</b> |
| Gaussian Noise    | 14.80 | 12.72 $\pm$ 0.04 | 14.38 $\pm$ 0.14 | 14.03 $\pm$ 0.10 | <b>25.32 <math>\pm</math>0.14</b> |
| Shot noise        | 16.03 | 13.78 $\pm$ 0.08 | 17.34 $\pm$ 0.27 | 15.25 $\pm$ 0.17 | <b>27.90 <math>\pm</math>0.05</b> |
| Impulse Noise     | 13.85 | 7.82 $\pm$ 0.14  | 10.03 $\pm$ 0.13 | 13.01 $\pm$ 0.13 | <b>25.62 <math>\pm</math>0.09</b> |
| Defocus blur      | 36.74 | 33.38 $\pm$ 0.11 | 49.05 $\pm$ 0.07 | 37.60 $\pm$ 0.17 | <b>49.88 <math>\pm</math>0.23</b> |
| Glass blur        | 14.19 | 9.00 $\pm$ 0.05  | 3.71 $\pm$ 0.07  | 16.41 $\pm$ 0.02 | <b>27.89 <math>\pm</math>0.03</b> |
| Motion blur       | 36.14 | 32.79 $\pm$ 0.13 | 46.62 $\pm$ 0.27 | 37.52 $\pm$ 0.23 | <b>47.93 <math>\pm</math>0.14</b> |
| Zoom blur         | 40.24 | 37.57 $\pm$ 0.15 | 51.84 $\pm$ 0.15 | 42.99 $\pm$ 0.11 | <b>52.70 <math>\pm</math>0.06</b> |
| Snow              | 38.95 | 35.49 $\pm$ 0.18 | 46.71 $\pm$ 0.21 | 42.35 $\pm$ 0.13 | <b>49.72 <math>\pm</math>0.01</b> |
| Frost             | 40.56 | 37.22 $\pm$ 0.21 | 44.90 $\pm$ 0.27 | 43.31 $\pm$ 0.14 | <b>49.63 <math>\pm</math>0.12</b> |
| Fog               | 38.00 | 35.94 $\pm$ 0.09 | 47.31 $\pm$ 0.04 | 38.81 $\pm$ 0.17 | <b>48.77 <math>\pm</math>0.04</b> |
| Brightness        | 48.18 | 44.93 $\pm$ 0.08 | 60.58 $\pm$ 0.18 | 50.23 $\pm$ 0.11 | <b>61.27 <math>\pm</math>0.08</b> |
| Contrast          | 29.53 | 27.52 $\pm$ 0.06 | 45.90 $\pm$ 0.11 | 28.09 $\pm$ 0.09 | <b>48.55 <math>\pm</math>0.24</b> |
| Elastic transform | 26.33 | 24.01 $\pm$ 0.02 | 33.09 $\pm$ 0.08 | 28.12 $\pm$ 0.15 | <b>37.45 <math>\pm</math>0.08</b> |
| Pixelate          | 21.98 | 19.55 $\pm$ 0.13 | 26.47 $\pm$ 0.09 | 20.43 $\pm$ 0.14 | <b>33.88 <math>\pm</math>0.14</b> |
| JPEG compression  | 25.91 | 21.77 $\pm$ 0.14 | 29.89 $\pm$ 0.07 | 28.82 $\pm$ 0.09 | <b>36.07 <math>\pm</math>0.32</b> |
| Average           | 29.43 | 26.23            | 35.19            | 30.46            | <b>41.51</b>                      |

Table 16. Accuracy (%) on CIFAR-100 and CIFAR-100-C datasets with ViT-B/32 as visual encoder.
